# Supplementary figures and images for: Plasma BRAF Mutation Detection for the Diagnostic and Monitoring Trajectory of Patients with LDH-High Stage IV Melanoma
Source: MDPI journal article supplement (doi:10.3390/cancers13153913), 2021-08-03

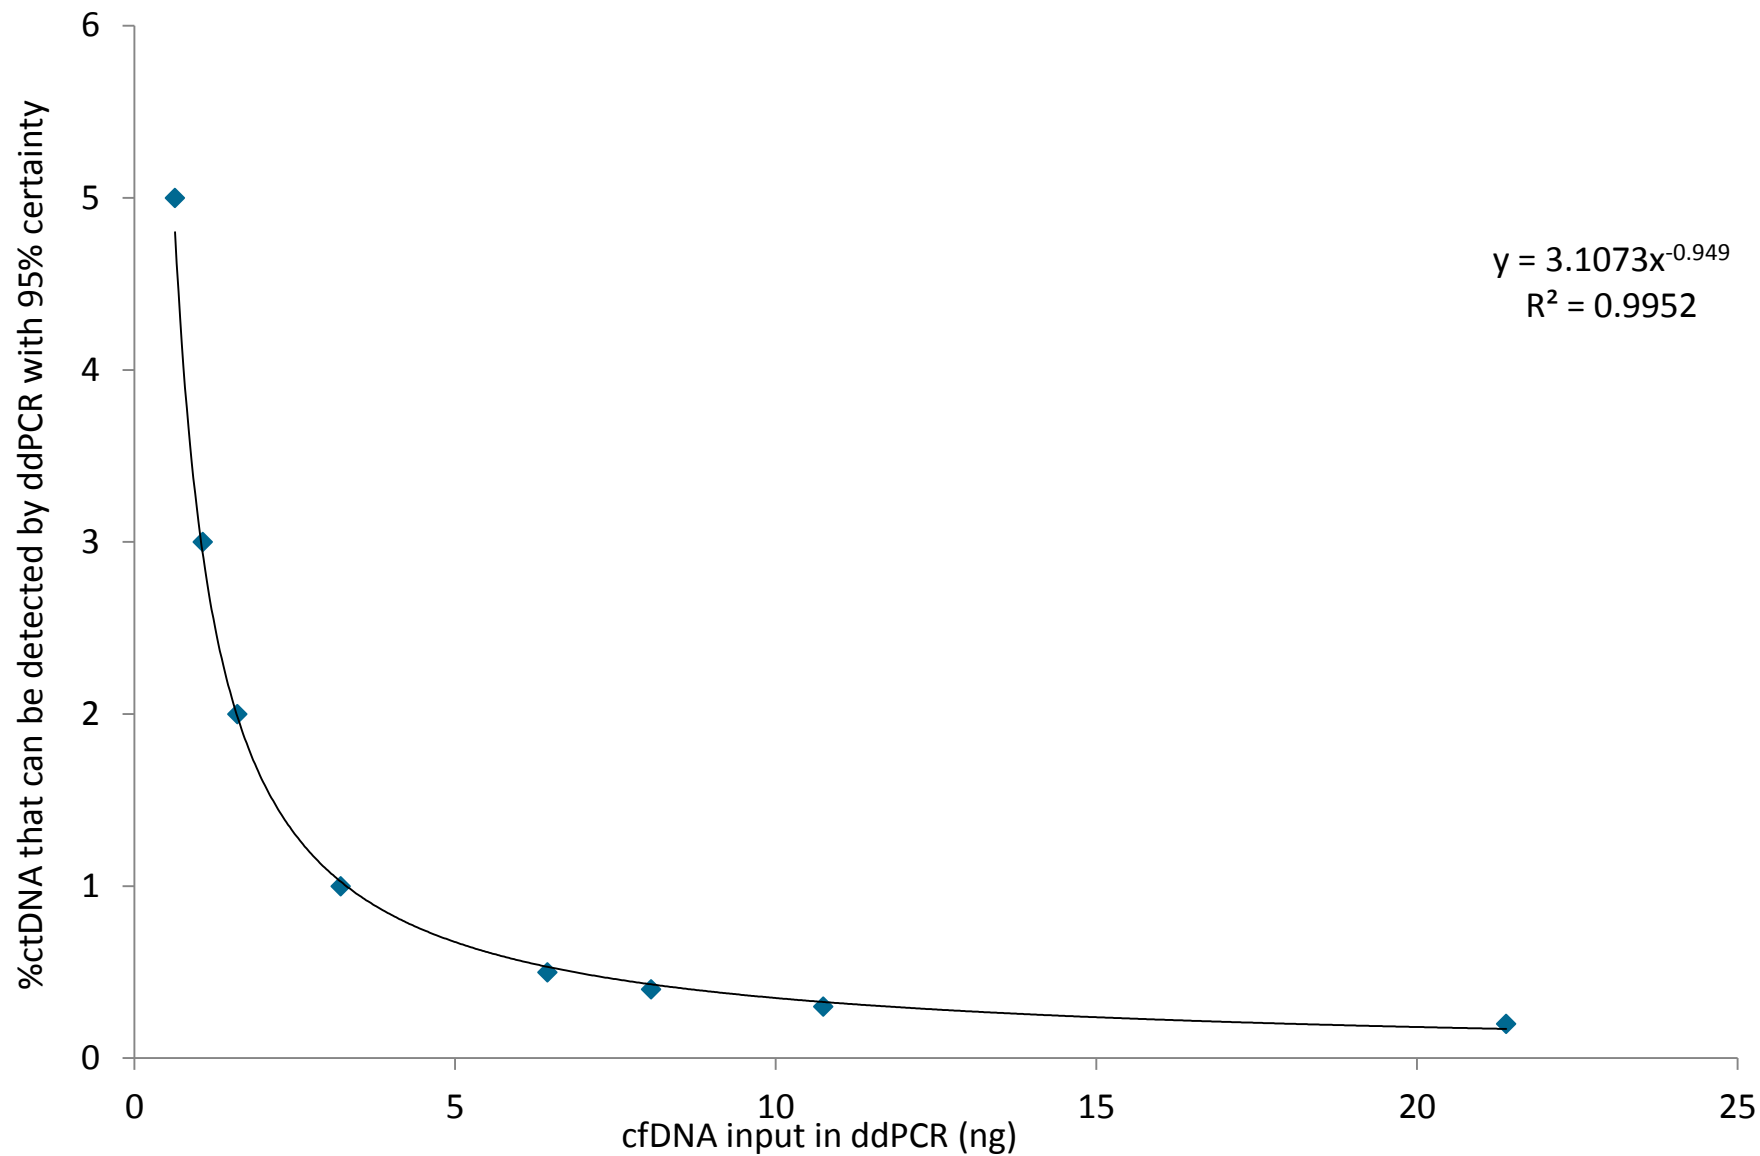

Supplement: s1 [file s1]
